# Supplementary material for: Occurrence and Genotypic Identification of Blastocystis spp., Enterocytozoon bieneusi, and Giardia duodenalis in Leizhou Black Goats in Zhanjiang City, Guangdong Province, China
Source: MDPI journal article supplement (doi:10.3390/ani13172777), 2023-08-31
Supplement: s1 [file s1]

**Table S2.** GenBank accession numbers of all *SSU rRNA* gene sequences of *Blastocystis* spp. used for phylogenetic analysis (Figure 2), and associated information.

| GenBank ID | Subtypes      | Origin                    | Country        | Genotype |
|------------|---------------|---------------------------|----------------|----------|
| KC148207   | ST10          | <i>Camelusdromedarius</i> | United Kingdom | ST10     |
| MT042814   | ST10          | Sheep                     | Czech Republic | ST10     |
| MK240481   | ST10          | Cattle                    | Malaysia       | ST10     |
| MK937750   | ST10          | Sheep                     | China          | ST10     |
| MZ265404   | ST10          | Goat                      | USA            | ST10     |
| AB070988   | ST3           | Human                     | Japan          | ST3      |
| MN526781   | ST3           | Sheep                     | United Kingdom | ST3      |
| AB091235   | ST3           | Human                     | Japan          | ST3      |
| AY618266   | ST1           | Human                     | Thailand       | ST1      |
| AY618265   | ST2           | Human                     | Thailand       | ST2      |
| MN526815   | ST14          | Eurasianelk               | United Kingdom | ST14     |
| ON796560   | ST14          | Sheep                     | China          | ST14     |
| MW648930   | ST14          | Goat                      | Malaysia       | ST14     |
| ON796563   | ST21          | Goat                      | China          | ST21     |
| OM883875   | ST21          | Sheep                     | Denmark        | ST21     |
| OM883869   | ST21          | Muskox                    | Denmark        | ST21     |
| MW850524   | ST5           | Sheep                     | China          | ST5      |
| ON809458   | ST5           | Sheep                     | China          | ST5      |
| MK937752   | ST5           | Sheep                     | China          | ST5      |
| AY590115   | not available | Sea snake                 | France         | Outgroup |
