# Supplementary material for: Occurrence and Genotypic Identification of Blastocystis spp., Enterocytozoon bieneusi, and Giardia duodenalis in Leizhou Black Goats in Zhanjiang City, Guangdong Province, China
Source: MDPI journal article supplement (doi:10.3390/ani13172777), 2023-08-31
Supplement: s1 [file s1]

**Table S3.** GenBank accession numbers of all ITS gene sequences of *E. bieneusi* used for phylogenetic analysis (Figure 3), and associated information.

| GenBank ID | Genotype | Origin                  | Country  | Group    |
|------------|----------|-------------------------|----------|----------|
| MH822618   | CHG1     | Goat                    | China    | Group2   |
| KU604931   | CM21     | Goldensnub-nosedmonkey  | China    | Group2   |
| MT231509   | ET-L2    | Calf                    | Ethiopia | Group2   |
| MK322762   | BEB6     | Tan sheep               | China    | Group2   |
| MH937115   | CGS1     | Sheep                   | China    | Group2   |
| MH822618   | CHG3     | Goat                    | China    | Group2   |
| KP262366   | CHG2     | Goat                    | China    | Group2   |
| AF135836   | I        | Cattle                  | Germany  | Group2   |
| AF135837   | J        | Cattle                  | Germany  | Group2   |
| KR062124   | WR8      | <i>Apodemusagrarius</i> | Poland   | Group9   |
| KR062125   | WR7      | <i>Apodemusagrarius</i> | Poland   | Group9   |
| JF681175   | KB-1     | Baboon                  | Kenya    | Group8   |
| HM992511   | CHN4     | Human                   | China    | Group1   |
| AF242478   | type IV  | Human                   | France   | Group1   |
| AF101200   | D        | Human                   | Germany  | Group1   |
| MH817462   | CTS3     | Tibetan sheep           | China    | Group1   |
| OM101102   | PigSpEb2 | Cattle                  | China    | Group1   |
| MT193871   | EbpC     | Dairy calves            | China    | Group1   |
| JN997480   | Nig4     | Human                   | Nigeria  | Group6   |
| AY237212   | WL4      | Muskrat                 | USA      | Group3   |
| AY237214   | WL6      | Muskrat                 | USA      | Group3   |
| KT267287   | CHK2     | Gray kangaroo           | China    | Group10  |
| KM591952   | XH7      | <i>Saimirisciureus</i>  | China    | Group7   |
| KJ728811   | CM18     | <i>Lemurcatta</i>       | China    | Group7   |
| JQ863274   | WW6      | Wastewater              | USA      | Group4   |
| AY237209   | WL1      | Raccoon                 | USA      | Group4   |
| JF681180   | KB-6     | Baboon                  | Kenya    | Group5   |
| DQ683757   | CAF4     | Human                   | France   | Group5   |
| KJ668735   | CD8      | Dog                     | China    | Group11  |
| DQ885585   | PtEb IX  | Dog                     | Portugal | Outgroup |
