# Supplementary material for: Occurrence and Genotypic Identification of Blastocystis spp., Enterocytozoon bieneusi, and Giardia duodenalis in Leizhou Black Goats in Zhanjiang City, Guangdong Province, China
Source: MDPI journal article supplement (doi:10.3390/ani13172777), 2023-08-31
Supplement: s1 [file s1]

**Table S4.** GenBank accession numbers of all *bg* gene sequences of *G. duodenalis* used for phylogenetic analysis (Figure 4), and associated information.

| GenBank ID | Genotype      | Origin                  | Country | Assemblage   |
|------------|---------------|-------------------------|---------|--------------|
| JX978265   | E             | Goat                    | Brazil  | Assemblage E |
| EU189361   | E             | Goat                    | Spain   | Assemblage E |
| MK452880   | E             | Sheep                   | Greece  | Assemblage E |
| MK573338   | E             | Tibetan cattle          | China   | Assemblage E |
| MK573342   | E             | Tibetan sheep           | China   | Assemblage E |
| KY769091   | E             | Cattle                  | China   | Assemblage E |
| MK610390   | E1            | Tan sheep               | China   | Assemblage E |
| KY432834   | E12           | Cattle                  | China   | Assemblage E |
| AY647264   | F             | Cat                     | Italy   | Assemblage F |
| JX275388   | F             | Cat                     | China   | Assemblage F |
| KP687765   | AI            | Human                   | Canada  | Assemblage A |
| KM926506   | AI            | Foal                    | Belgium | Assemblage A |
| FJ560591   | AI            | Human                   | France  | Assemblage A |
| EU769221   | G             | <i>Rattusnorvegicus</i> | Sweden  | Assemblage G |
| MF169196   | B             | Horse                   | China   | Assemblage B |
| MG736251   | B             | Human                   | China   | Assemblage B |
| KY979500   | D             | Dog                     | China   | Assemblage D |
| AY545647   | D             | Dog                     | Italy   | Assemblage D |
| MN044596   | C             | Dog                     | China   | Assemblage C |
| KY979502   | C             | Dog                     | China   | Assemblage C |
| LC437432   | C             | Dog                     | Japan   | Assemblage C |
| MT713338   | not available | Mouse                   | USA     | Outgroup     |
